# Supplementary material
Source: HighWire-hosted journal article supplement (https://ijgc.bmj.com/content/31/12/1595)
Supplement: inline-supplementary-material-1 [file inline-supplementary-material-1.pdf]

**Appendix 1****Laparoscopic/Robotic Hysterectomy, Bilateral Salpingo-Oophorectomy Surgeon Protocol**

- The patient is under general anaesthetic and ventilated;
- Allan stirrups or equivalent are used to rest the patient's legs;
- Preoperative antibiotic is given at least 15 minutes before skin incision;
- Positioning in the lower lithotomy position with the arms parallel to the patient or the arms resting on the patient's chest;
- One (peri-)umbilical port, which carries the telescope plus multiple other 5 mm ports are inserted;
- Pelvic washings are collected for cytology;
- Division of the round ligament in order to enter the retroperitoneum;
- The ovarian pedicle is secured and divided; in selected patients, the preservation of ovaries is accepted;
- The peritoneum of the broad ligament, both the anterior and the posterior leaves are divided;
- The incision is carried anteriorly, and the bladder peritoneum is incised at the cervico-uterine junction and the bladder is reflected;
- A vaginal device (e.g., tube) is inserted transvaginally;
- Bladder reflection is completed, and the bladder pillars are lateralised over the edge of the tube;
- The uterine artery is identified, secured and divided at the level of the rim of the tube; alternatively, the uterine vessels can be secured at their origin at the level of the internal iliac vessels;
- The vagina is circumcised over the vaginal tube and the specimen is removed through the vaginal tube;
- Morcellation of the specimen is prohibited. If the specimen is too large to be extracted transvaginally, an abdominal incision will be made to retrieve the specimen;
- Enlarged, suspicious lymph nodes or any other suspicious tissues will be removed through the transvaginal tube or a port (through an endobag); these tissues will need to be labelled by providing location of nodes (aortic, caval, common iliac, external iliac, obturator, presacral) and side (right, left);
- Laparoscopic/Robotic suture of the vault is performed while the CO2 pneumoperitoneum is maintained; suturing the vagina through a vaginal approach is unwarranted.

| <b>Appendix 2</b>                             |                                                                                                                                                                                                                                                                                                                                                                                                                                                                                                                                                                                                                                                                                                                                                                                                                                         |
|-----------------------------------------------|-----------------------------------------------------------------------------------------------------------------------------------------------------------------------------------------------------------------------------------------------------------------------------------------------------------------------------------------------------------------------------------------------------------------------------------------------------------------------------------------------------------------------------------------------------------------------------------------------------------------------------------------------------------------------------------------------------------------------------------------------------------------------------------------------------------------------------------------|
| <b>Follow-up Procedures</b>                   |                                                                                                                                                                                                                                                                                                                                                                                                                                                                                                                                                                                                                                                                                                                                                                                                                                         |
| Day 1 – after surgery                         | Record the postoperative Haemoglobin level taken on the day after surgery (if done)                                                                                                                                                                                                                                                                                                                                                                                                                                                                                                                                                                                                                                                                                                                                                     |
| Postoperative Week 1 $\pm$ 3 days (Visit 3)   | <ul style="list-style-type: none"> <li>• Provide participant with questionnaire booklet</li> <li>• Review ECOG performance score</li> <li>• Weight if available</li> <li>• Assess participants for their individual pain level using Numeric Pain Rating Scale</li> <li>• Record full blood count, urea and electrolytes and liver function tests if available</li> <li>• Physical examination – not a requirement at this time point, however record done/not done</li> <li>• Collect all adverse events. Assess using Common Terminology Criteria for Adverse Events (CTCAE) v5.0</li> <li>• Update all concomitant medications</li> <li>• Update illnesses/morbidities</li> <li>• Electronic case report form completed</li> </ul>                                                                                                   |
| Postoperative Week 6 $\pm$ 7 days (Visit 4)   | <ul style="list-style-type: none"> <li>• Provide participant with questionnaire booklet</li> <li>• Lymphoedema assessments via bioimpedance spectroscopy and/or self-report questionnaire</li> <li>• Review ECOG performance score</li> <li>• Weight if available</li> <li>• Assess participants for their individual pain level using Numeric Pain Rating Scale</li> <li>• Record full blood count, urea and electrolytes and liver function tests if available</li> <li>• Physical examination – not a requirement at this time point, however record done/not done</li> <li>• Collect all adverse events. Assess using Common Terminology Criteria for Adverse Events (CTCAE) v5.0</li> <li>• Update all concomitant medications</li> <li>• Update illnesses/morbidities</li> <li>• Electronic case report form completed</li> </ul> |
| Postoperative Month 3 $\pm$ 14 days (Visit 5) | <ul style="list-style-type: none"> <li>• Provide participant with questionnaire booklet</li> <li>• Lymphoedema assessments via bioimpedance spectroscopy and/or self-report questionnaire</li> <li>• Review ECOG performance score</li> <li>• Weight if available</li> <li>• Assess participants for their individual pain level Numeric Pain Rating Scale</li> <li>• Record full blood count, urea and electrolytes and liver function tests if available</li> <li>• Physical examination –must be done every 3-6 months, record if done/not done</li> <li>• Queensland Centre for Gynaecological Cancer (QCGC) symptom checklist</li> </ul>                                                                                                                                                                                           |

|                                                     |                                                                                                                                                                                                                                                                                                                                                                                                                                                                                                                                                                                                                                                                                                                                                                                                                                                                                                         |
|-----------------------------------------------------|---------------------------------------------------------------------------------------------------------------------------------------------------------------------------------------------------------------------------------------------------------------------------------------------------------------------------------------------------------------------------------------------------------------------------------------------------------------------------------------------------------------------------------------------------------------------------------------------------------------------------------------------------------------------------------------------------------------------------------------------------------------------------------------------------------------------------------------------------------------------------------------------------------|
|                                                     | <ul style="list-style-type: none"> <li>• Collect all adverse events. Assess using Common Terminology Criteria for Adverse Events (CTCAE) v5.0</li> <li>• Update all concomitant medications</li> <li>• Update illnesses/morbidities</li> <li>• Electronic case report form completed</li> </ul>                                                                                                                                                                                                                                                                                                                                                                                                                                                                                                                                                                                                         |
| Postoperative<br>Month 6 $\pm$ 30 days<br>(Visit 6) | <ul style="list-style-type: none"> <li>• Provide participant with questionnaire booklet</li> <li>• Lymphoedema assessments via bioimpedance spectroscopy, leg circumference measurements (QLD only) and/or self-report questionnaire</li> <li>• Review ECOG performance score</li> <li>• Weight if available</li> <li>• Assess participants for their individual pain level using Numeric Pain Rating Scale</li> <li>• Record full blood count, urea and electrolytes and liver function tests if available</li> <li>• Physical examination- must be done every 3-6 months, record if done/not done</li> <li>• QCGC symptom checklist</li> <li>• Collect all adverse events. Assess using Common Terminology Criteria for Adverse Events (CTCAE) v5.0</li> <li>• Update all concomitant medications</li> <li>• Update illnesses/morbidities</li> <li>• Electronic case report form completed</li> </ul> |
| Postoperative<br>Month 9 (Visit 7)                  | <p><b>Must be collected any time after the date of last visit and up to 2 weeks after the due date of this visit.</b></p> <ul style="list-style-type: none"> <li>• Provide participant with questionnaire booklet</li> <li>• Lymphoedema assessments via bioimpedance spectroscopy and/or self-report questionnaire</li> <li>• Weight if available</li> <li>• Physical examination- must be done every 3-6 months, record if done/not done</li> <li>• QCGC symptom checklist</li> <li>• Collect all adverse events. Assess using Common Terminology Criteria for Adverse Events (CTCAE) v5.0</li> <li>• Update all concomitant medications</li> <li>• Update illnesses/morbidities</li> <li>• Electronic case report form completed</li> </ul>                                                                                                                                                          |
| Postoperative<br>Month 12 (Visit 8)                 | <p><b>Must be collected any time after the date of last visit and up to 2 weeks after the due date of this visit.</b></p> <ul style="list-style-type: none"> <li>• Provide participant with questionnaire booklet</li> <li>• Lymphoedema assessments via bioimpedance spectroscopy, leg circumference measurements (QLD only) and/or self-report questionnaire</li> <li>• Weight must be recorded at this visit</li> <li>• Physical examination- must be done every 3-6 months, record if done/not done</li> <li>• QCGC symptom checklist</li> </ul>                                                                                                                                                                                                                                                                                                                                                    |

|                                                |                                                                                                                                                                                                                                                                                                                                                                                                                                                                                                                                                                       |
|------------------------------------------------|-----------------------------------------------------------------------------------------------------------------------------------------------------------------------------------------------------------------------------------------------------------------------------------------------------------------------------------------------------------------------------------------------------------------------------------------------------------------------------------------------------------------------------------------------------------------------|
|                                                | <ul style="list-style-type: none"><li>• Collect all adverse events. Assess using Common Terminology Criteria for Adverse Events (CTCAE) v5.0</li><li>• Update all concomitant medications</li><li>• Update illnesses/morbidities</li><li>• Electronic case report form completed</li></ul>                                                                                                                                                                                                                                                                            |
| Postoperative<br>Month 18 - 54<br>(Visit 9-18) | <b>Must be collected any time after the date of last visit and up to 2 weeks after the due date of this visit.</b> <ul style="list-style-type: none"><li>• Clinic visit and/or QCGC symptom checklist</li><li>• Bloods, pathology, results/scans etc to establish participant status if required/available</li><li>• Electronic case report form completed</li><li>• Physical examination record at each visit if it has been done. Must be done every 3-6 months up to 2 years post operatively and then 6monthly up to 4.5 years, record if done/not done</li></ul> |
